# Supplementary material for: Transdisciplinary allied health assessment for patients with stroke: a pre-/post- mixed methods study protocol
Source: Springer Nature journal article supplement (doi:10.1186/s12913-022-08926-y), 2022-12-24
Supplement: MOESM4 [file 23857238]

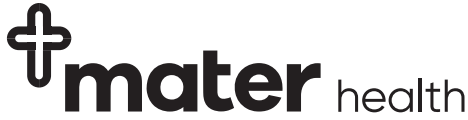

TRANSDISCIPLINARY INITIAL NEUROLOGICAL SCREENING ASSESSMENT (TINSA)

Unit Record No. \_\_\_\_\_
Surname \_\_\_\_\_
Given Names \_\_\_\_\_
DOB \_\_\_\_\_ Sex \_\_\_\_\_

AFFIX PATIENT IDENTIFICATION LABEL HERE

Admitting diagnosis/investigations:

History of presenting condition:

Medical history:

Assessment completed with:

Social History

Living arrangement: [ ] Alone [ ] Partner/Family [ ] Other:
Carer role: [ ] Provides care [ ] Receives care [ ] Suspected carer stress
Details (who/how much support):

Formal services: [ ] Yes [ ] No Details:

[ ] Refer to SW (e.g. lack of support, complex social situation, suspected carer stress, advanced care planning)

Previous Level of Function and Activity Participation

Occupation: [ ] Full-time [ ] Part-time [ ] Retired Details:

Education level:

Mobility/transfers: [ ] Independent [ ] SBA [ ] Assist

Falls in last 12 months: [ ] Yes [ ] No Reason:

Eating/diet: [ ] Independent [ ] SBA [ ] Assist (normal/modified; dentition)

Toileting/continence: [ ] Independent [ ] SBA [ ] Assist

Dressing: [ ] Independent [ ] SBA [ ] Assist

Showering: [ ] Independent [ ] SBA [ ] Assist

Meal prep: [ ] Independent [ ] SBA [ ] Assist

Shopping: [ ] Independent [ ] SBA [ ] Assist

Cleaning: [ ] Independent [ ] SBA [ ] Assist

Laundry: [ ] Independent [ ] SBA [ ] Assist

Gardening: [ ] Independent [ ] SBA [ ] Assist

Medication: [ ] Independent [ ] SBA [ ] Assist

Finances: [ ] Independent [ ] SBA [ ] Assist

Driving: [ ] Yes [ ] No Alternate transport:

Leisure/exercise regime:

Home Environment

Housing: [ ] House [ ] Unit [ ] Townhouse [ ] Retirement village [ ] RACF [ ] Other:

Ownership: [ ] Owner [ ] Rented [ ] Department of Housing [ ] Other:

Stairs: Front - rails ascending: [ ] Left [ ] Right Back - rails ascending: [ ] Left [ ] Right
Internal - rails ascending: [ ] Left [ ] Right Side - rails ascending: [ ] Left [ ] Right

Ground level rooms:

Upstairs rooms:

Bathroom: [ ] Shower recess [ ] Bath [ ] Shower over bath [ ] Hob [ ] Rails [ ] HHSH [ ] FSH [ ] Door [ ] Curtain
Equipment:

Toilet: [ ] In bathroom [ ] Separate [ ] Rails [ ] Equipment:

Other equipment: Personal alarm: [ ] Yes [ ] No

Previous OT home visit: [ ] Yes [ ] No If YES, details:

Cognition

Documented/reported history of cognitive impairment? [ ] Yes [ ] No If YES, details:

MSQ: /10 [ ] Day [ ] Date [ ] Month [ ] Year [ ] DOB [ ] Age [ ] Address [ ] Location [ ] PM [ ] PPM

Insight into deficits: [ ] Yes [ ] Partial [ ] No

Comments:

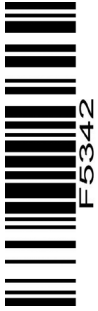

F5342

Binding margin - do not write. Do not reproduce by photocopying. All clinical form creation and amendments must be conducted through Health Information.

TRANSDISCIPLINARY INITIAL NEUROLOGICAL SCREENING ASSESSMENT (TINSA)

Unit Record No. \_\_\_\_\_  
 Surname \_\_\_\_\_  
 Given Names \_\_\_\_\_  
 DOB \_\_\_\_\_ Sex \_\_\_\_\_  
 AFFIX PATIENT IDENTIFICATION LABEL HERE

**Communication**

Hearing aids?  Nil  Left  Right  ALD required Primary language: \_\_\_\_\_  
 Has your speech changed recently (e.g. slurred)?  Yes  No  
 If YES, details: \_\_\_\_\_  
 New difficulties thinking of words, reading, writing, understanding what people say?  Yes  No  
 If YES, details: \_\_\_\_\_  
 Have your family/friends noticed any changes with your communication/language?  Yes  No  
 If YES, details/changes: \_\_\_\_\_

**Informal communication screen**

|                                                  |                                                                                                                                                                                                                                                                                                                                                                                                                                                                                                                     |
|--------------------------------------------------|---------------------------------------------------------------------------------------------------------------------------------------------------------------------------------------------------------------------------------------------------------------------------------------------------------------------------------------------------------------------------------------------------------------------------------------------------------------------------------------------------------------------|
| Observations: language in conversation           | <input type="checkbox"/> Level 1 = Normal language<br><input type="checkbox"/> Level 2 = Able to speak in sentences but word finding difficulties evident<br><input type="checkbox"/> Level 3 = Speaking only in single words or short phrases – can communicate basic needs/wants<br><input type="checkbox"/> Level 4 = Very limited or no verbal output – unable to communicate basic needs/wants<br><input type="checkbox"/> Level 5 = Nonsensical or no verbal output – unable to communicate basic needs/wants |
| Naming/word retrieval                            | <i>Name the following objects that I point to:</i><br>Bed _____ Glass/cup _____ Elbow _____ Light _____ Pillow _____ Correct: /5                                                                                                                                                                                                                                                                                                                                                                                    |
| Auditory verbal communication (yes/no questions) | <i>I'm going to ask you some questions, answer yes or no.</i><br>1. Is your name Smith?<br>2. Is your name _____? (say patient's last name)<br>3. Are the lights on in this room?<br>4. Is the door/curtain closed?<br>5. Does March come before June?<br>Correct: /5                                                                                                                                                                                                                                               |
| Speech clarity                                   | <input type="checkbox"/> Normal<br><input type="checkbox"/> Impaired but easy to understand<br><input type="checkbox"/> Impaired and difficult to understand<br>Comments: _____                                                                                                                                                                                                                                                                                                                                     |
| Observations: pragmatics                         | <input type="checkbox"/> Reduced eye contact<br><input type="checkbox"/> Flat facial expression/voice<br><input type="checkbox"/> Poor conversation turn taking/initiation<br>Other: _____                                                                                                                                                                                                                                                                                                                          |

**Sheffield Screening Test for Acquired Language Disorders – Receptive skills**

|                                                                                                                                                                                       |    |
|---------------------------------------------------------------------------------------------------------------------------------------------------------------------------------------|----|
| 1. Verbal comprehension of single words<br><i>I'm going to ask you to point to some of the things in the room...</i><br>Door _____ Light _____ Chair _____ Ceiling _____ Corner _____ | /1 |
| 2. Comprehension of sequential command<br>a. point to the window and then to the door /1<br>b. before pointing to the ceiling, touch the chair/bed /1                                 | /2 |
| 3. Comprehension of a complex command<br><i>Tap the chair/bed twice with a clenched fist, while looking at the ceiling.</i>                                                           | /1 |

**Stop communication assessment HERE and refer to SP if:**  NESB  
 Scores 3–5 in language in conversation  Scores <5/5 naming  Scores <5/5 yes/no questions  
 Speech clarity "impaired and difficult to understand"  Unable to follow 1 stage command

|                                                                                                                                                                                                                                                                                                                                                                                                                                                                                                                                                             |           |
|-------------------------------------------------------------------------------------------------------------------------------------------------------------------------------------------------------------------------------------------------------------------------------------------------------------------------------------------------------------------------------------------------------------------------------------------------------------------------------------------------------------------------------------------------------------|-----------|
| 4. Recognition of differences in meaning between words<br><i>I'm going to read you a list of words and I want you to tell me which is the odd one out...</i><br>a. chicken, duck, apple, turkey Response: _____ /1<br>b. run, drink, walk, sprint Response: _____ /1<br>c. small, large, massive, huge Response: _____ /1                                                                                                                                                                                                                                   | /3        |
| 5. Comprehension of Narrative<br>a. <i>I'm going to read you a short paragraph and then ask you a question about it.</i><br>"John went to the shop to buy a pen. When he got there he found that he had forgotten his wallet, so he came home and made himself a cup of tea. What should he have taken with him?" Response: _____ /1<br>b. <i>I'm going to read you another paragraph.</i><br>"Mrs Smith visited several shops. She bought a newspaper, a cauliflower, a stamp and some sausages. What was the second shop she visited?" Response: _____ /1 | /2        |
| <b>Total receptive skills score</b>                                                                                                                                                                                                                                                                                                                                                                                                                                                                                                                         | <b>/9</b> |

All clinical form creation and amendments must be conducted through Health Information. Binding margin - do not write. Do not reproduce by photocopying.

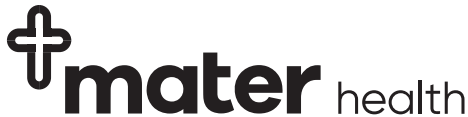

**TRANSDISCIPLINARY INITIAL  
NEUROLOGICAL SCREENING  
ASSESSMENT (TINSA)**

Unit Record No. \_\_\_\_\_

Surname \_\_\_\_\_

Given Names \_\_\_\_\_

DOB \_\_\_\_\_ Sex \_\_\_\_\_

AFFIX PATIENT IDENTIFICATION LABEL HERE

**Communication** (continued)

**Sheffield Screening Test for Acquired Language Disorders – Expressive skills**

|                                                                                                                                                                                                                                          |                    |
|------------------------------------------------------------------------------------------------------------------------------------------------------------------------------------------------------------------------------------------|--------------------|
| 6. Word Finding<br>Tell me the names of three well-known places (in the client's home town). Response: _____                                                                                                                             | /1                 |
| 7. Abstract word finding<br>Tell me another word that means the same as:<br>a. beautiful Response: _____ /1<br>b. angry Response: _____ /1<br>c. ridiculous Response: _____ /1                                                           | /3                 |
| 8. Sequencing<br>Describe how you would make a cup of tea. Response: _____ /1<br>A correct answer contains two or more appropriate stages in the right order.                                                                            | /1                 |
| 9. Definitions<br>Describe what the following words mean:<br>a. home Response: _____ /1<br>b. search Response: _____ /1<br>c. ambitious Response: _____ /1                                                                               | /3                 |
| 10. Verbal reasoning<br>I'd like you to tell me:<br>a. why you would use an umbrella Response: _____ /1<br>b. why people go on holiday Response: _____ /1<br>c. what would you do if you were locked out of the house Response: _____ /1 | /3                 |
| <b>Total expressive skills score</b>                                                                                                                                                                                                     | <b>/11</b>         |
| <input type="checkbox"/> Below normal <input type="checkbox"/> ≥ Normal (age 59 and under ≥17; age 60–69 ≥16; age 70 and over ≥15)                                                                                                       | <b>TOTAL SCORE</b> |
|                                                                                                                                                                                                                                          | <b>/20</b>         |

Overall impression, communication is:

Functional and no changes identified

Functional but deficits observed or reported, **SP review indicated**

Not functional or restricted communication, **URGENT SP review indicated**

**Refer to SP for communication** (reports changes; observed deficits in informal communication screen; stop and refer prompt ticked; below norm or unable to complete Sheffield)

**Swallowing**

Dysphagia screen completed by:  Nursing  SP  Neither Outcome:  Pass  Fail

Current diet/fluids: \_\_\_\_\_

Have you noticed any difficulties with your swallowing?  Yes  No If YES, details: \_\_\_\_\_

Drizzling or pooling secretions observed?  Yes  No If YES, details: \_\_\_\_\_

**Refer to SP for swallowing**

**Vision and Perception**

|                                                                            |                                                                                                                |  |
|----------------------------------------------------------------------------|----------------------------------------------------------------------------------------------------------------|--|
| Glasses: <input type="checkbox"/> Yes <input type="checkbox"/> No          | Visual tracking: <input type="checkbox"/> Intact <input type="checkbox"/> Impaired                             |  |
| Blurry vision: <input type="checkbox"/> Yes <input type="checkbox"/> No    | Convergence: <input type="checkbox"/> Intact <input type="checkbox"/> Impaired                                 |  |
| Diplopia: <input type="checkbox"/> Yes <input type="checkbox"/> No         | Visual field: <input type="checkbox"/> Intact <input type="checkbox"/> Impaired (indicate →)                   |  |
| Nystagmus: <input type="checkbox"/> Yes <input type="checkbox"/> No        | Visuospatial neglect: <input type="checkbox"/> Left <input type="checkbox"/> Right <input type="checkbox"/> No |  |
| Reading: <input type="checkbox"/> Intact <input type="checkbox"/> Impaired |                                                                                                                |  |

Comments: \_\_\_\_\_

**Refer to OT for:** \_\_\_\_\_

**Respiratory Assessment**

Medical history:  Asthma  COPD  Bronchiectasis  Active lung cancer  Other (specify): \_\_\_\_\_

Shortness of breath:  Yes  No Difficulty breathing:  Yes  No

Phlegm/mucus:  Yes  No Cough on command:  Strong  Weak

RR 9–20 bpm: \_\_\_\_\_ SpO<sub>2</sub> >95% (>85% for COPD): \_\_\_\_\_

**Safe to proceed to mobility assessment?**  Yes  No

If NO, reason:  Shortness of breath  Difficulty breathing  SpO<sub>2</sub> ≤95% (≤85% for COPD)

**Refer to PT for review** (medical history; "yes" to any question; weak cough; RR or SpO<sub>2</sub> outside range)

Binding margin - do not write. Do not reproduce by photocopying. All clinical form creation and amendments must be conducted through Health Information.

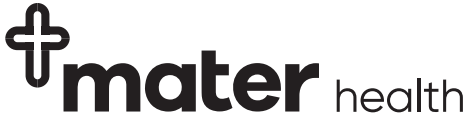

**TRANSDISCIPLINARY INITIAL  
NEUROLOGICAL SCREENING  
ASSESSMENT (TINSA)**

Unit Record No. \_\_\_\_\_

Surname \_\_\_\_\_

Given Names \_\_\_\_\_

DOB \_\_\_\_\_ Sex \_\_\_\_\_

AFFIX PATIENT IDENTIFICATION LABEL HERE

**Upper and Lower Limbs**

Dominance:  Left  Right      Affected limb(s): \_\_\_\_\_  
 Hypertonicity:  Left  Right  No \_\_\_\_\_  
 Oedema:  Yes  No \_\_\_\_\_ Pain (VAS): \_\_\_\_\_

| Limb       | ROM/MMT |       | Light touch sensation |       | Proprioception |       |
|------------|---------|-------|-----------------------|-------|----------------|-------|
|            | Left    | Right | Left                  | Right | Left           | Right |
| Upper limb |         |       |                       |       |                |       |
| Lower limb |         |       |                       |       |                |       |

**Coordination**

FNF:  Intact  Impaired – details: \_\_\_\_\_  
 Diadochokinesis:  Intact  Impaired – details: \_\_\_\_\_  
 Heel-shin slide\*:  Intact  Impaired – details: *\*Do not complete if poor skin integrity* \_\_\_\_\_  
 Foot-tapping:  Intact  Impaired – details: \_\_\_\_\_  
 Sensorimotor neglect:  No  Left  Right  
 Shoulder precautions required?  Yes  No  
 If YES:  Left  Right  "Support my arm" band provided  Collar and Cuff provided  Positioning charts provided  
 Comments: \_\_\_\_\_

Safe to proceed to mobility assessment?  Yes  No      If NO, reason:  Cognition  Neglect  LL < 3/5  LL ataxia

Refer to  OT  PT for: \_\_\_\_\_

**Functional Mobility Assessment**

**Vestibular screen** Vestibular Screening Tool (VST): \_\_\_\_\_ /8 *\*Stop and refer to PT if VST ≥4/8 (do not complete mobility assessment)*

**Vital signs** SBP (mmHg): \_\_\_\_\_ HR (BMP): \_\_\_\_\_ Temperature (°C): \_\_\_\_\_

Check observation chart for usual SBP if:  SBP <110mmHg  SBP >160mmHg

Medical clearance if:  SBP <90mmHg  SBP >180mmHg  HR <40bpm  HR >120bpm

*Stop and refer to PT if:*  SBP drops ≥20mmHg with change of position  Fevers/>38.5°C

**Current LOF**

Bed mobility:  Independent  SBA  Assist *\*Stop and refer to PT if "assist"* \_\_\_\_\_

Sitting balance:  Independent  SBA  Assist *\*Stop and refer to PT if "SBA"/"assist"* \_\_\_\_\_

Transfers:  Independent  SBA  Assist *\*Stop and refer to PT if "assist"/new aid* \_\_\_\_\_

Standing balance:  Independent  SBA  Assist *\*Stop and refer to PT if "assist"/new aid* \_\_\_\_\_

Mobility:  Independent  SBA  Assist *\*Stop and refer to PT if "assist"/new aid* \_\_\_\_\_

**10 meter walk test (10MWT)** Steps: \_\_\_\_\_ Time: \_\_\_\_\_ : \_\_\_\_\_ Step length: \_\_\_\_\_ Velocity: \_\_\_\_\_

**Timed up and go (TUG)** Time: \_\_\_\_\_ : \_\_\_\_\_ Mobility aid: \_\_\_\_\_

Refer to PT      Below normal:  10MWT  TUG

Binding margin - do not write. Do not reproduce by photocopying. All clinical form creation and amendments must be conducted through Health Information.

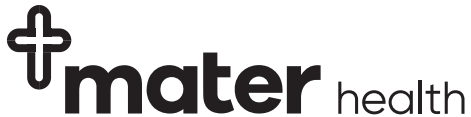

**TRANSDISCIPLINARY INITIAL  
NEUROLOGICAL SCREENING  
ASSESSMENT (TINSA)**

Unit Record No. \_\_\_\_\_

Surname \_\_\_\_\_

Given Names \_\_\_\_\_

DOB \_\_\_\_\_ Sex \_\_\_\_\_

AFFIX PATIENT IDENTIFICATION LABEL HERE

**Mood**

I'm going to show you some words and pictures, can you pick the one(s) that describes or looks like how you are feeling?

- Angry     Scared     Worried     Overwhelmed     Sad     Alone     Vulnerable  
 Neutral     Calm     Safe     Positive     Happy     Hopeful

Do you have any stressors or worries while you stay in hospital?     Yes     No

If YES, details: .....

- Affect observations:     Elated     Teary     Flat/low mood     Anxious     Restless/agitated/fidgety     Avoids eye contact     Dismissive/passive  
 Other (specify): .....

**Refer to SW** (e.g. anxiety/depression, psychosocial stressors, clinician concerns, incongruent self-report vs. affect observations)

**Other observations** (e.g. fatigue, patient concerns)

.....

.....

.....

.....

.....

.....

.....

.....

.....

.....

.....

**Summary of Assessment and Plan**

Allied Health clinical impressions:

.....

.....

.....

.....

.....

.....

.....

.....

.....

.....

.....

.....

.....

**Referrals**

- OT:**    Cognitive assessment (if confirmed TIA/stroke) .....
- PT:** .....
- SP:** .....
- SW:** .....
- Other:** .....

Rehabilitation candidate:     Yes     No     Further assessment required

Safe to discharge:     Yes     No

|             |                    |                  |             |                    |
|-------------|--------------------|------------------|-------------|--------------------|
| Name: _____ | Designation: _____ | Signature: _____ | Date: _____ | Time (24hr): _____ |
|-------------|--------------------|------------------|-------------|--------------------|

Binding margin - do not write. Do not reproduce by photocopying. All clinical form creation and amendments must be conducted through Health Information.
