# Supplementary material for: Transdisciplinary allied health assessment for patients with stroke: a pre-/post- mixed methods study protocol
Source: Springer Nature journal article supplement (doi:10.1186/s12913-022-08926-y), 2022-12-24
Supplement: MOESM6 [file 23857238]

**Staff Satisfaction Survey**

**1. What is your role on the ward?**

- Allied Health       Nurse       Doctor       Other \_\_\_\_\_

**2. How many years have you worked in stroke care?**

- Less than 5 years     5 – 10 years       10 – 15 years       More than 15 years

**3. Did the Transdisciplinary Initial Neurological Screen help you to be more efficient or less efficient in your practice?**

- More efficient       Less efficient       No change       Don't know what that is

**4. What were the benefits of the Transdisciplinary Initial Neurological Screen?**

- Reduced time spent completing assessment
- Reduced time spent reading allied health assessment
- Helped to efficiently formulate my plan
- Allied health assessments are located in the same place
- Helped to complete Nursing care pathway
- Patients weren't repeatedly asked the same questions
- Improved collaborative team approach
- Helped me make appropriate allied health referrals
- I didn't notice any change
- Other \_\_\_\_\_

**5. Do you feel confident that the information on the Transdisciplinary Initial Neurological Screen is reliable and accurate?**

- Yes       No       Unsure

**5a. And what makes you feel this way?**

---

---

**6. What were the challenges of using the Transdisciplinary Initial Neurological Screen? And are there any changes that could be made that would assist your practice?**

---

---

---

**7. Compared to the usual assessment process (i.e. discipline-specific assessments), do you think anything was overlooked or foregone by utilising the novel TINS?**

---

---

---

---

**8. Any other comments?**

---

---

---
