# Supplementary material for: Transdisciplinary allied health assessment for patients with stroke: a pre-/post- mixed methods study protocol
Source: Springer Nature journal article supplement (doi:10.1186/s12913-022-08926-y), 2022-12-24
Supplement: MOESM7 [file 23857238]

## Interprofessional Staff Trust Survey

### INSTRUCTION:

In all of the following questions, we ask you to consider a scenario in which a health practitioner (from another profession/discipline) is **assessing** your patient, and where the **findings of that assessment will directly impact** on how you will treat that patient when you next see the patient.

#### 1. What professional group do you belong to?

- Medical
- Nursing
- Allied Health and Assistants
- Other

#### 2. How much would you trust another health professional to look out for the patient's interests?

0 \_\_\_\_\_ 1 \_\_\_\_\_ 2 \_\_\_\_\_ 3 \_\_\_\_\_ 4 \_\_\_\_\_ 5 \_\_\_\_\_ 6 \_\_\_\_\_ 7 \_\_\_\_\_ 8 \_\_\_\_\_ 9 \_\_\_\_\_ 10

0 – not at all

10 - completely

#### 3. How much would you trust another health professional to be open and discuss their assessment findings with you?

0 \_\_\_\_\_ 1 \_\_\_\_\_ 2 \_\_\_\_\_ 3 \_\_\_\_\_ 4 \_\_\_\_\_ 5 \_\_\_\_\_ 6 \_\_\_\_\_ 7 \_\_\_\_\_ 8 \_\_\_\_\_ 9 \_\_\_\_\_ 10

0 – not at all

10 - completely

#### 4. How much would you trust another health professional to tell you the truth about their findings?

0 \_\_\_\_\_ 1 \_\_\_\_\_ 2 \_\_\_\_\_ 3 \_\_\_\_\_ 4 \_\_\_\_\_ 5 \_\_\_\_\_ 6 \_\_\_\_\_ 7 \_\_\_\_\_ 8 \_\_\_\_\_ 9 \_\_\_\_\_ 10

0 – not at all

10 - completely

#### 5. How much would you trust another health professional to do what needs to be done (e.g. complete an assessment) without errors?

0 \_\_\_\_\_ 1 \_\_\_\_\_ 2 \_\_\_\_\_ 3 \_\_\_\_\_ 4 \_\_\_\_\_ 5 \_\_\_\_\_ 6 \_\_\_\_\_ 7 \_\_\_\_\_ 8 \_\_\_\_\_ 9 \_\_\_\_\_ 10

0 – not at all

10 - completely

Remember: we ask you to consider a scenario in which a health practitioner (from another profession/discipline) is **assessing** your patient, and where the **findings of that assessment will directly impact** on how you will treat that patient when you next see them.

**6. How much would you trust another health professional to protect private patient information?**

0 \_\_\_\_\_ 1 \_\_\_\_\_ 2 \_\_\_\_\_ 3 \_\_\_\_\_ 4 \_\_\_\_\_ 5 \_\_\_\_\_ 6 \_\_\_\_\_ 7 \_\_\_\_\_ 8 \_\_\_\_\_ 9 \_\_\_\_\_ 10

0 – not at all

10 - completely

**7. How much would you trust another health professional to do what is best for the patient?**

0 \_\_\_\_\_ 1 \_\_\_\_\_ 2 \_\_\_\_\_ 3 \_\_\_\_\_ 4 \_\_\_\_\_ 5 \_\_\_\_\_ 6 \_\_\_\_\_ 7 \_\_\_\_\_ 8 \_\_\_\_\_ 9 \_\_\_\_\_ 10

0 – not at all

10 - completely

**8. How much would you trust another health professional to reliably do an assessment that has implications for what you will do when you next see the patient?**

0 \_\_\_\_\_ 1 \_\_\_\_\_ 2 \_\_\_\_\_ 3 \_\_\_\_\_ 4 \_\_\_\_\_ 5 \_\_\_\_\_ 6 \_\_\_\_\_ 7 \_\_\_\_\_ 8 \_\_\_\_\_ 9 \_\_\_\_\_ 10

0 – not at all

10 - completely

**9. How much would you trust another health professional to see the patient in a timely way when they are admitted to the ward?**

0 \_\_\_\_\_ 1 \_\_\_\_\_ 2 \_\_\_\_\_ 3 \_\_\_\_\_ 4 \_\_\_\_\_ 5 \_\_\_\_\_ 6 \_\_\_\_\_ 7 \_\_\_\_\_ 8 \_\_\_\_\_ 9 \_\_\_\_\_ 10

0 – not at all

10 - completely

Still thinking about a scenario in which a health practitioner (from another profession/discipline) is **assessing** your patient, and where the **assessment findings will impact** on how you will treat that patient when you next see them:

**10. Thinking about a context in which health practitioners work across disciplines (e.g., nurses assessing some tasks that doctors might usually perform), how much would you trust the Mater to support such a model of health service delivery?**

0 \_\_\_\_\_ 1 \_\_\_\_\_ 2 \_\_\_\_\_ 3 \_\_\_\_\_ 4 \_\_\_\_\_ 5 \_\_\_\_\_ 6 \_\_\_\_\_ 7 \_\_\_\_\_ 8 \_\_\_\_\_ 9 \_\_\_\_\_ 10

0 – not at all

10 - completely

**11. Thinking about a context in which health practitioners work across disciplines (e.g., nurses assessing some tasks that doctors might usually perform), would you agree to such a model of care/assessment at the Mater?**

0 \_\_\_\_\_ 1 \_\_\_\_\_ 2 \_\_\_\_\_ 3 \_\_\_\_\_ 4 \_\_\_\_\_ 5 \_\_\_\_\_ 6 \_\_\_\_\_ 7 \_\_\_\_\_ 8 \_\_\_\_\_ 9 \_\_\_\_\_ 10

0 – not at all

10 - completely

**12. Do you believe someone who is also trained in the transdisciplinary assessment (known as the multidisciplinary assessment on the AMU) would arrive at the same result as you?**

Yes       No       Unsure

Can you explain why you chose the above answer?

---

---

---

A final open-ended opportunity for comment:

**Please provide us with your thoughts about the idea of, or potential for, transdisciplinary care/assessment at the Mater:**

---

---

---

---
