# Supplementary material for: Transdisciplinary allied health assessment for patients with stroke: a pre-/post- mixed methods study protocol
Source: Springer Nature journal article supplement (doi:10.1186/s12913-022-08926-y), 2022-12-24
Supplement: MOESM8 [file 23857238]

## Building Staff Confidence Survey

### 1. Please indicate your profession:

- Occupational therapist (go to Q2, and answer all questions up to and including Q7)
- Physiotherapist (go to Q2, and answer all questions up to and including Q7)
- Speech Pathologist (go to Q8, and answer all questions up to and including Q11)
- Social Worker (go to Q12, and answer all questions up to and including Q15)

*If you are an **occupational therapist** or **physiotherapist**, please answer questions 2 – 7.  
Otherwise, please skip to question 8.*

### 2. How many years of experience do you have working as an occupational therapist or physiotherapist?

\_\_\_\_\_ years

### 3. Did you help develop the module content with the Transdisciplinary Initial Neurological Screening Assessment (TINSA) project working party?

- Yes
- No

### 4. How long have you been administering the TINSA?

- 1 month or less
- 1 - 2 months
- 2 – 3 months
- 3 – 4 months
- 4 – 5 months
- 5 – 6 months
- 6 months or more

### 5. How many times have you administered the TINSA?

- 5 or less
- 6 – 10
- 11 – 14
- 15 or more

*Remember that your rating of confidence does not necessarily reflect your clinical skills, so please answer the following questions as honestly as you can.*

6. Right now, on a scale of 1 (no confidence) to 10 (high confidence) how would you rate your confidence in completing the TINSAs with patients?

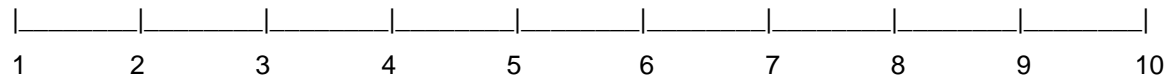

7. Right now, what assessments tasks or questions are you **NOT** confident with? (Select all that apply).

- Social History
- Mood
- Sheffield Screening Test for Acquired Language Disorders
- Respiratory assessment
- Visual screens
- Perceptual screens
- Upper limb assessments
- Lower limb assessments
- Shoulder precautions
- Functional mobility assessment
- 10-meter walk test
- Timed Up and Go (TUG)
- Other tasks or questions (please list):

---

---

---

*If you are an **occupational therapist** or **physiotherapist**, this is the end of the survey. Thank you for your participation.*

If you are a **speech pathologist**, please answer questions 8 - 11. Otherwise, please skip to question 12.

Remember that your rating of confidence does not necessarily reflect the clinical skills of your colleagues, so please answer the following questions as honestly as you can.

**8. Right now, on a scale of 1 (no confidence) to 10 (high confidence) how would you rate your confidence in the occupational therapists to complete the communication section of the TINSAs?**

1      2      3      4      5      6      7      8      9      10

**9. Right now, on a scale of 1 (no confidence) to 10 (high confidence) how would you rate your confidence in the occupational therapists to identify appropriate referrals to speech pathology?**

1      2      3      4      5      6      7      8      9      10

**10. Right now, on a scale of 1 (no confidence) to 10 (high confidence) how would you rate your confidence in the physiotherapists to complete the communication section of the TINSAs?**

1      2      3      4      5      6      7      8      9      10

**11. Right now, on a scale of 1 (no confidence) to 10 (high confidence) how would you rate your confidence in the physiotherapists to identify appropriate referrals to speech pathology?**

1      2      3      4      5      6      7      8      9      10

If you are a **speech pathologist**, this is the end of the survey. Thank you for your participation.

*If you are a **social worker**, please answer questions 12 -15. Otherwise, you have completed the survey, thank you for your participation.*

*Remember that your rating of confidence does not necessarily reflect the clinical skills of your colleagues, so please answer the following questions as honestly as you can.*

**12. Right now, on a scale of 1 (no confidence) to 10 (high confidence) how would you rate your confidence in the occupational therapists to complete the social history and mood section of the TINSA?**

|-----|-----|-----|-----|-----|-----|-----|-----|-----|-----|  
1        2        3        4        5        6        7        8        9        10

**13. Right now, on a scale of 1 (no confidence) to 10 (high confidence) how would you rate your confidence in the occupational therapists to identify appropriate referrals to social work?**

|-----|-----|-----|-----|-----|-----|-----|-----|-----|-----|  
1        2        3        4        5        6        7        8        9        10

**14. Right now, on a scale of 1 (no confidence) to 10 (high confidence) how would you rate your confidence in the physiotherapists to complete the social history and mood section of the TINSA?**

|-----|-----|-----|-----|-----|-----|-----|-----|-----|-----|  
1        2        3        4        5        6        7        8        9        10

**15. Right now, on a scale of 1 (no confidence) to 10 (high confidence) how would you rate your confidence in the physiotherapists to identify appropriate referrals to social work?**

|-----|-----|-----|-----|-----|-----|-----|-----|-----|-----|  
1        2        3        4        5        6        7        8        9        10

*If you are a **social worker**, this is the end of the survey. Thank you for your participation.*
